# Supplementary material for: Seminal Plasma Lipidomics Profiling to Identify Signatures of Kallmann Syndrome
Source: PubMed Central journal article supplement (PMC8358976; doi:10.3389/fendo.2021.692690), 2021-07-29

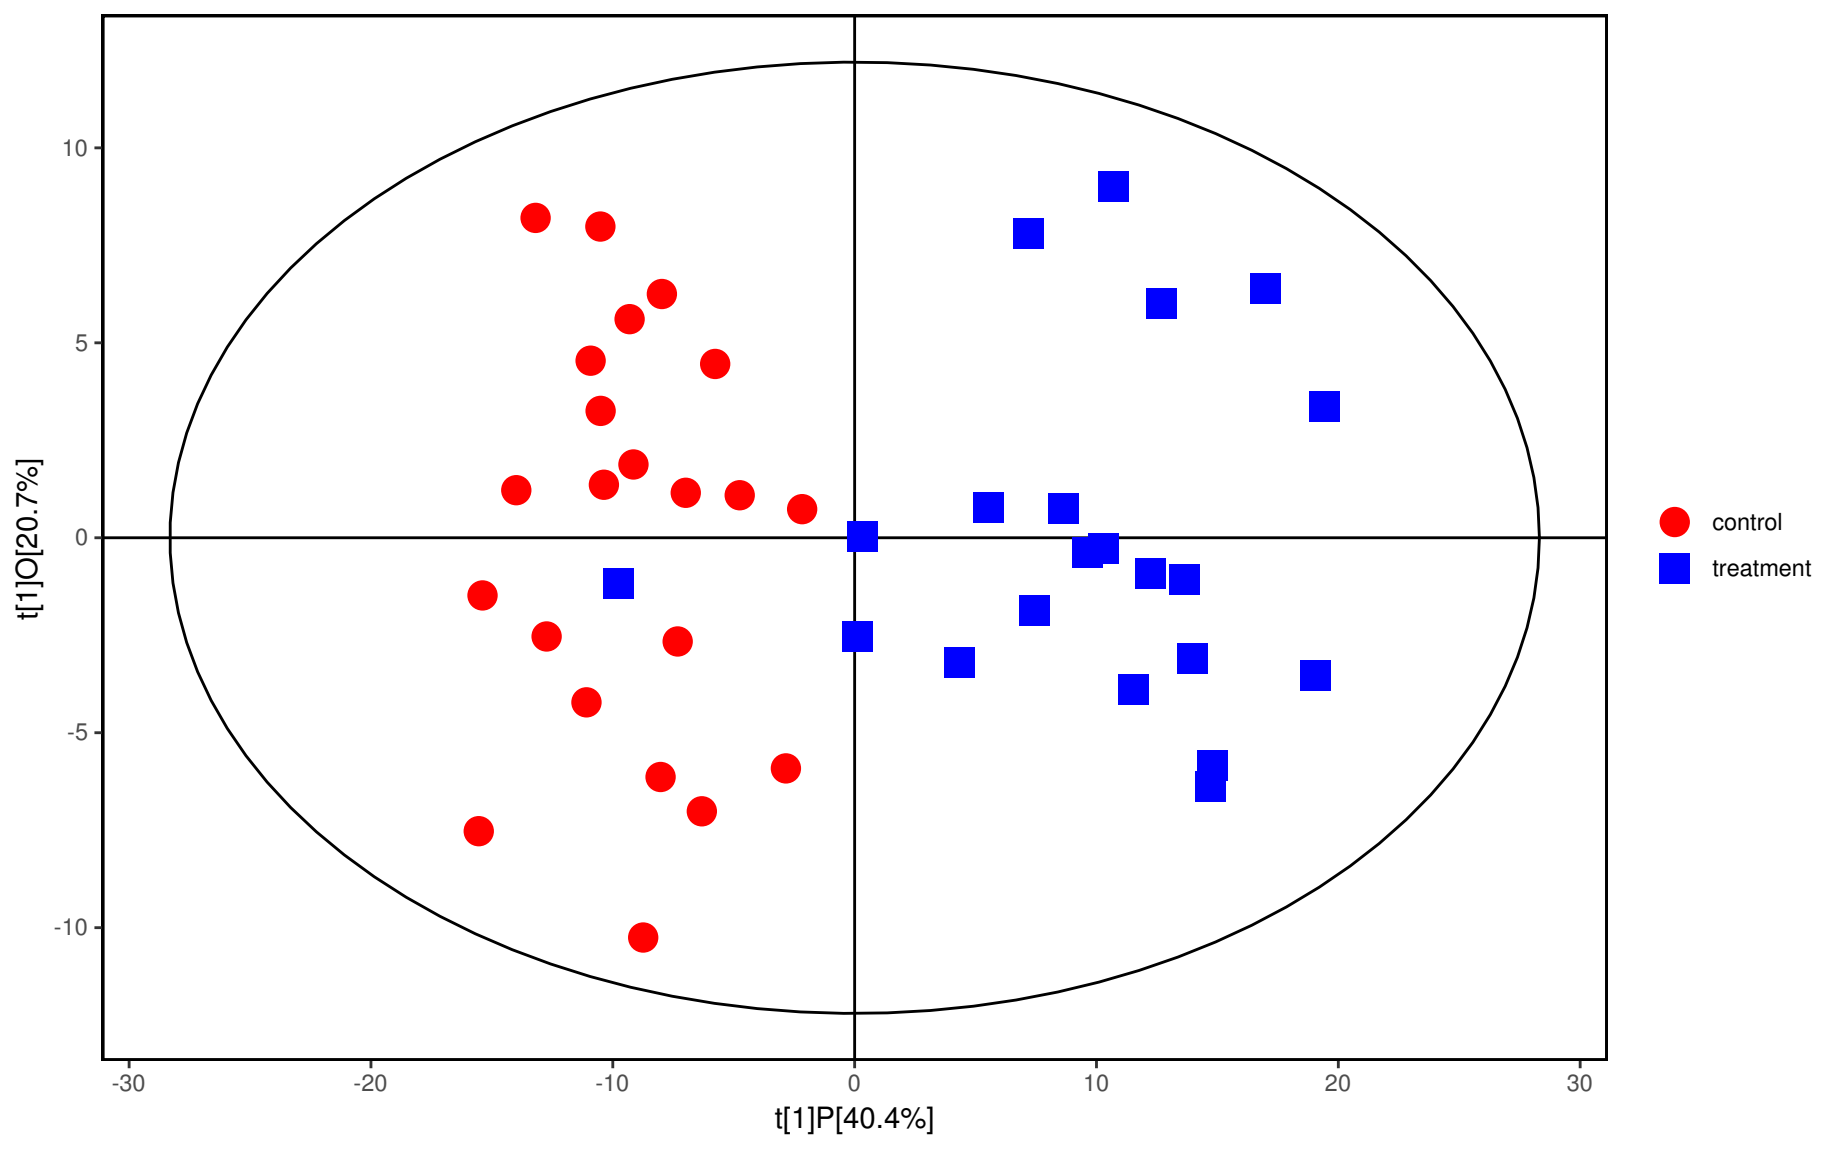

Supplement: Image_1.pdf [file Image_1.pdf]
